# Supplementary material for: A route to selectively increase the microporous structure of zeolite and its optimization in the ethanol to butadiene reaction
Source: Royal Society of Chemistry journal article supplement (doi:10.1039/d3im00087g), 2023-09-19
Supplement: d3im00087g1.pdf [file d3im00087g1.pdf]

## Supporting Information

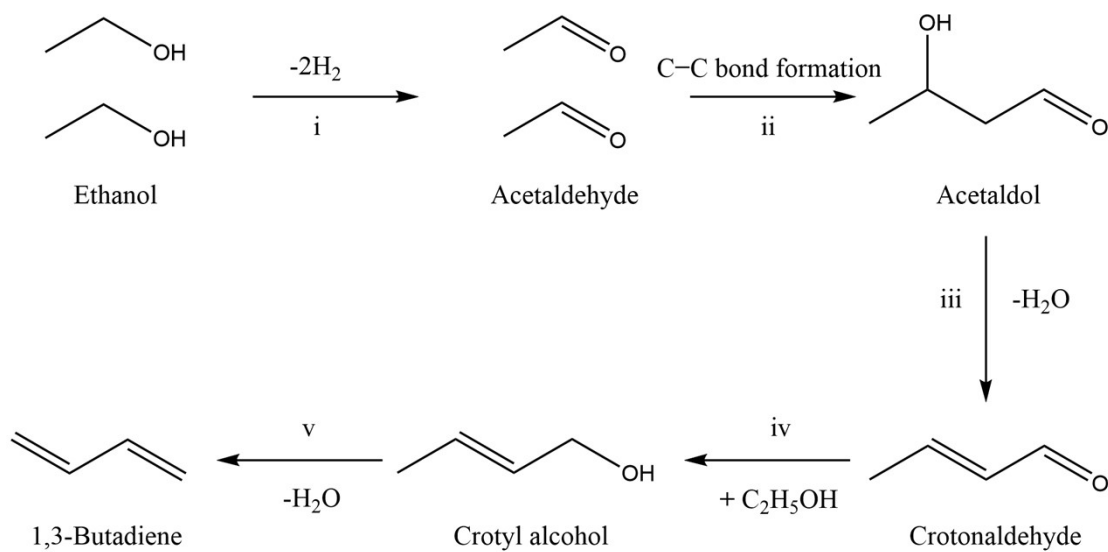

**Scheme S1** mechanism for the conversion of ethanol to butadiene

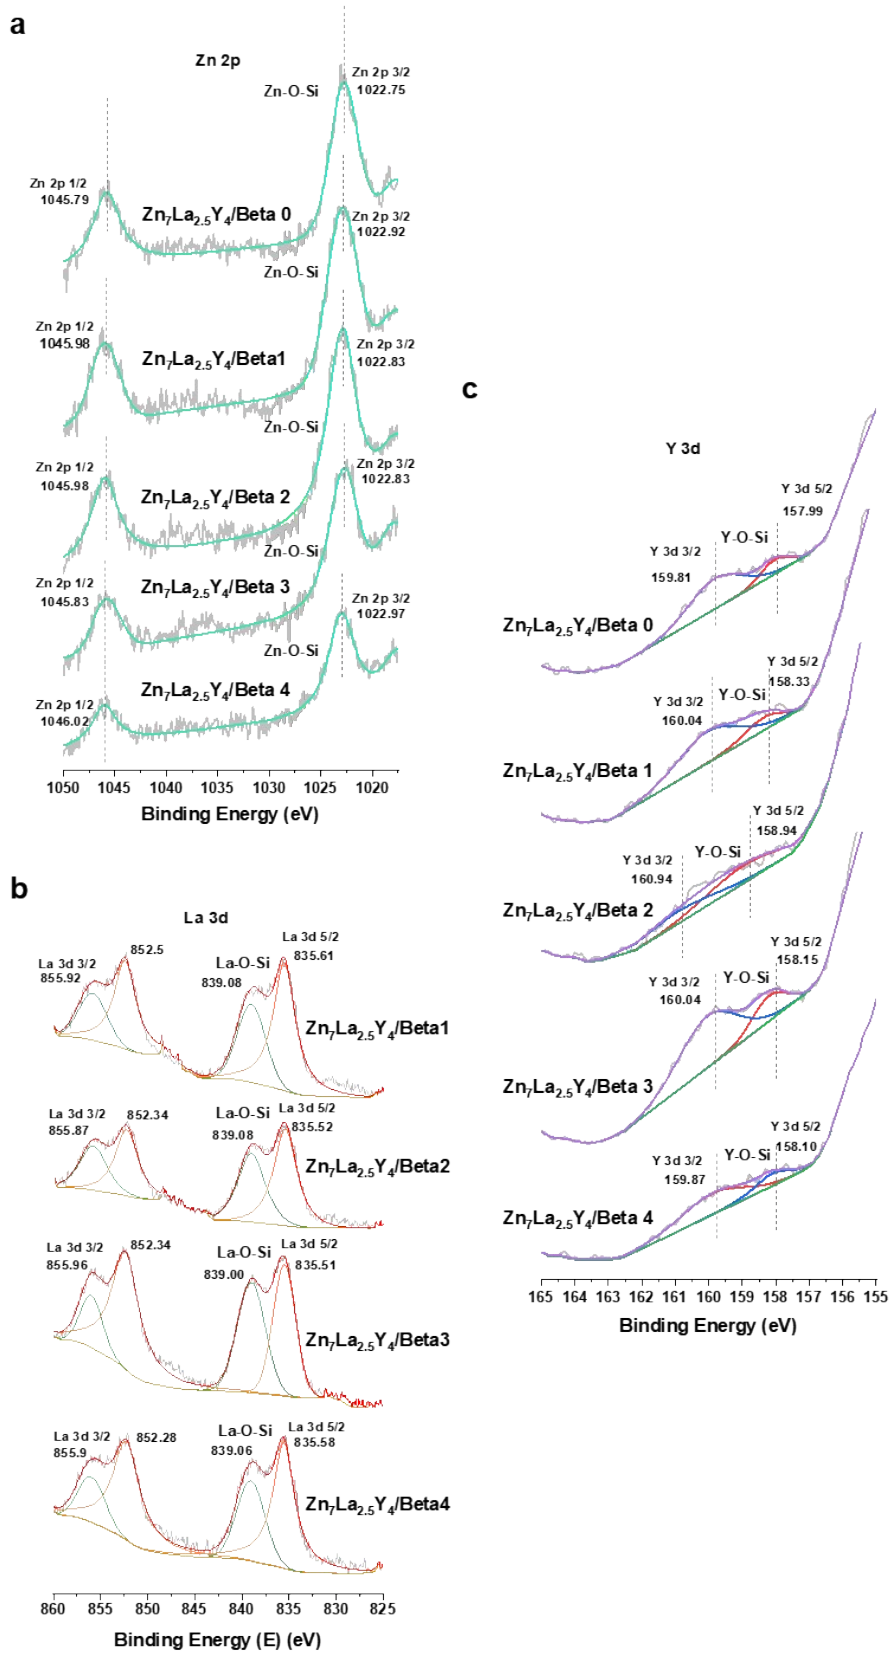

Fig. S1 the XP spectra of all ZnLaY/Beta catalysts
